# Supplementary material for: Rheology and microstructure of concentrated microcrystalline cellulose (MCC)/1-allyl-3-methylimidazolium chloride (AmimCl)/water mixtures
Source: Royal Society of Chemistry journal article supplement (doi:10.1039/c8sm01448e), 2018-01-01
Supplement: c8sm01448e1.pdf [file c8sm01448e1.pdf]

## Electronic Supplementary Information (ESI)

for

# Rheology and microstructure of concentrated Microcrystalline cellulose (MCC)/1-allyl-3-methylimidazolium chloride (AmimCl)/water mixtures

Ashna Rajeev, Abhijith P. Deshpande\*, and Madivala G. Basavaraj\*

Analysis of shear banding in MCC/AmimCl solutions<sup>1</sup>:

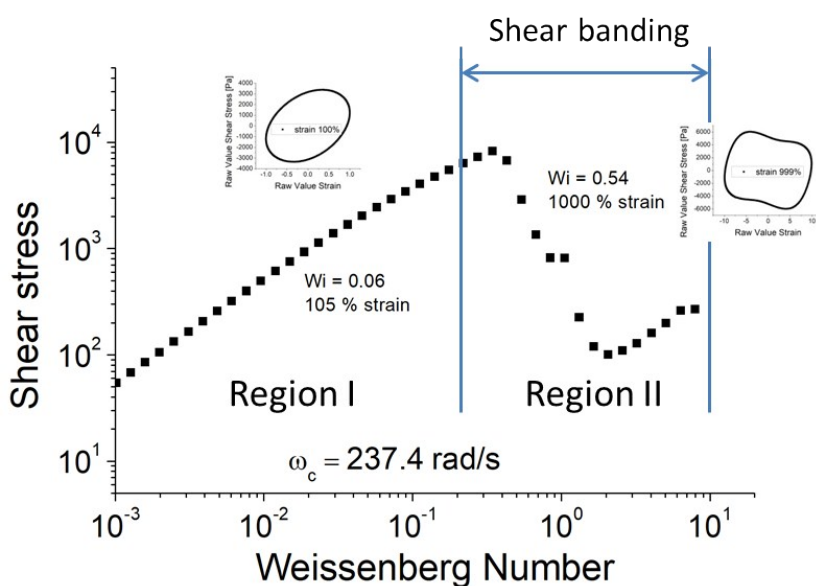

**Figure S 1** Shear stress Vs Weissenberg number ( $\dot{\gamma}\lambda, \dot{\gamma}_c\omega\lambda$ ) for 15 wt% MCC/AmimCl solution with 1.44 wt% water.

Gurnon *et al.* established an experimental methodology for analysing the shear banding phenomena in polymer-like micellar solutions connecting Rheo-SANS and non-linear rheology.<sup>1</sup> This analysis includes the use of steady shear and dynamic oscillatory shear rheology to obtain a plot of shear stress versus Weissenberg number ( $\dot{\gamma}\lambda$ ), similar to the plot shown in Figure S1. Here,  $\lambda$  is the relaxation time, which can be identified from the cross over frequency ( $\omega_c$ ) identified from frequency sweep and  $\dot{\gamma}$  is the shear rate from

steady shear data. The insets in Figure S1 show Lissajous curves with signatures of shear banding. Three regions can be identified from this graph as: region I corresponds to the entangled flow, where there is a monotonous increase in shear stress, region II with non-monotonous changes in shear stress which is evident for shear banded flow. Region III corresponding to unentangled flow at very high shear rates, as mentioned in Gurnon *et al.*<sup>1</sup> could not be identified as such high shear rates cannot be reached in the rheometer used. The Lissajous curves at different strain ( $\gamma_0$ ) corresponding to a particular Weissenberg number ( $\gamma_0\omega\lambda$ ) is identified from the strain sweep waveform data. The Lissajous curves corresponding to region II show the signature stress overshoot near zero strain, representing shear banding.

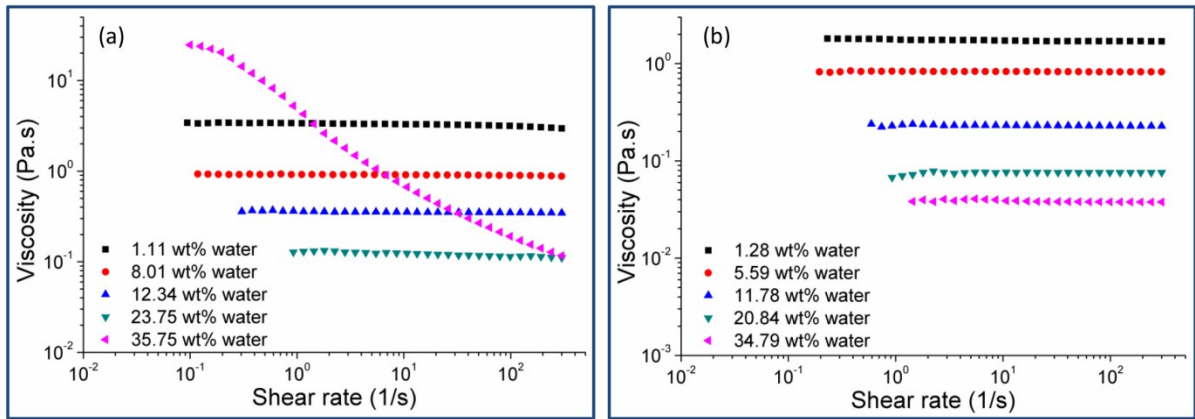

**Figure S 2** Steady shear viscosity of **(a)** 0.5 wt% of MCC/ AmimCl and **(b)** binary mixture of AmimCl/water as a function of shear rate at different water concentrations as shown in the legend.

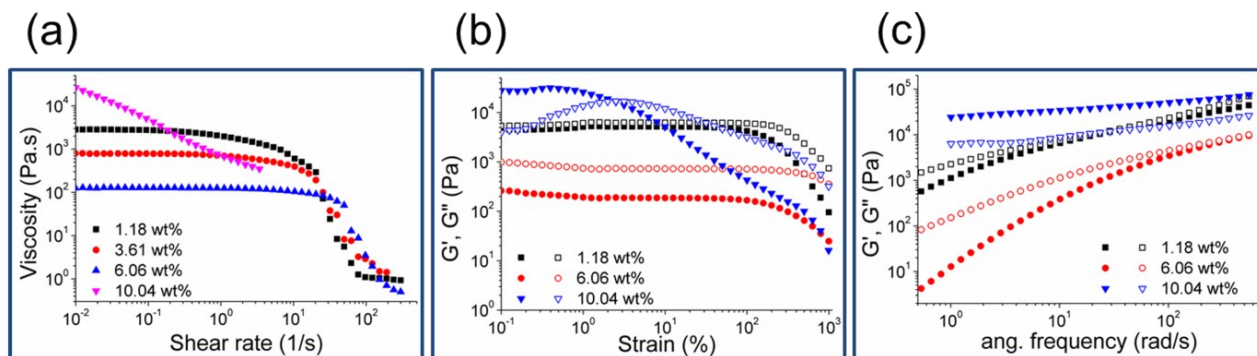

**Figure S 3** Rheological response of 10% MCC/BmimCl solution. (a) steady shear viscosity as a function of shear rate, (b) strain sweeps at 6.28 rad/s angular frequency and (c) small amplitude frequency sweep responses. The respective water concentrations are shown in the legend.

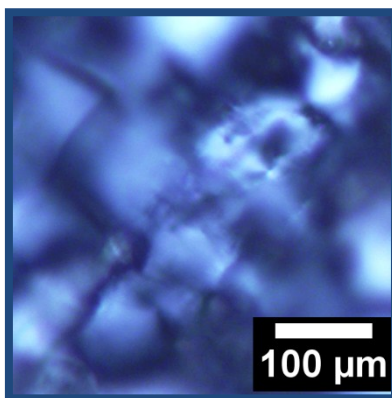

**Figure S 4** Polarization optical microscopy image of 10% MCC/BmimCl solution at 10.04 wt% water concentration, showing liquid crystalline domains.

## Reference:

- [1] A. K. Gurnon, C. R. Lopez-Barron, A. P. Eberle, L. Porcar and N. J. Wagner, *Soft Matter*, 2014, **10**, 2889–2898.
